# Supplementary material
Source: PubMed Central journal article supplement (PMC5500449)

### Neutrophils Percentage

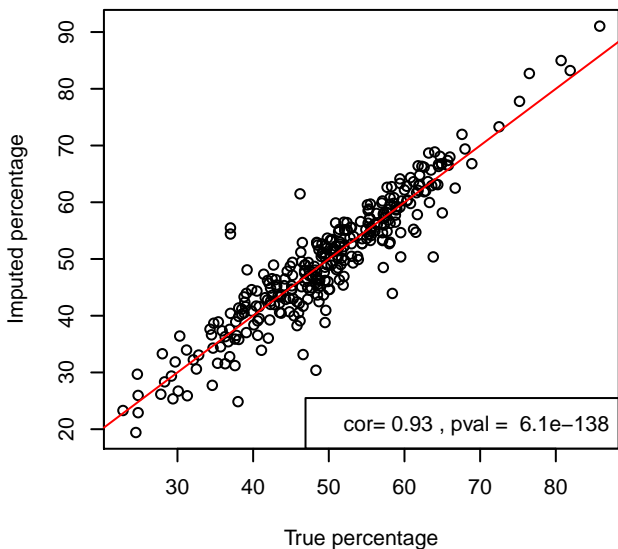

### Lymphocytes Percentage

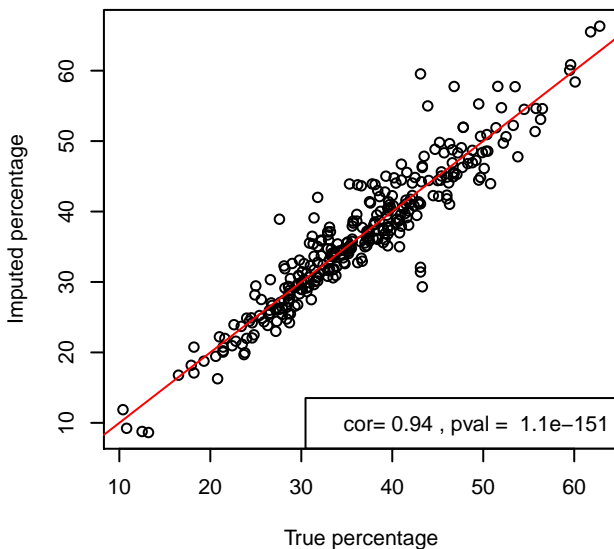

### Monocytes Percentage

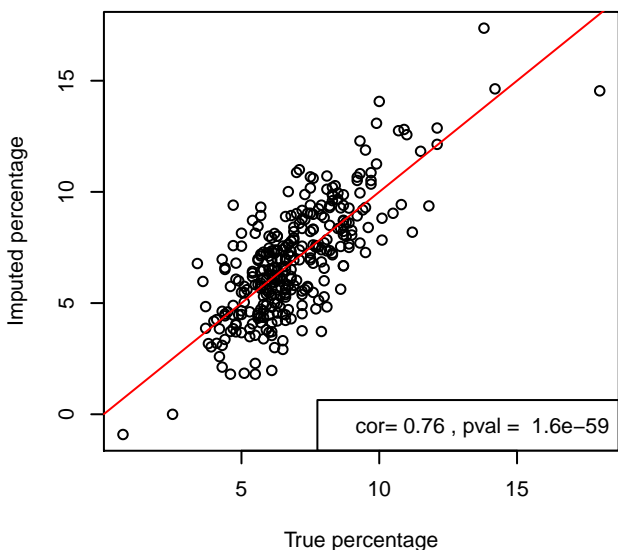

### Eosinophils Percentage

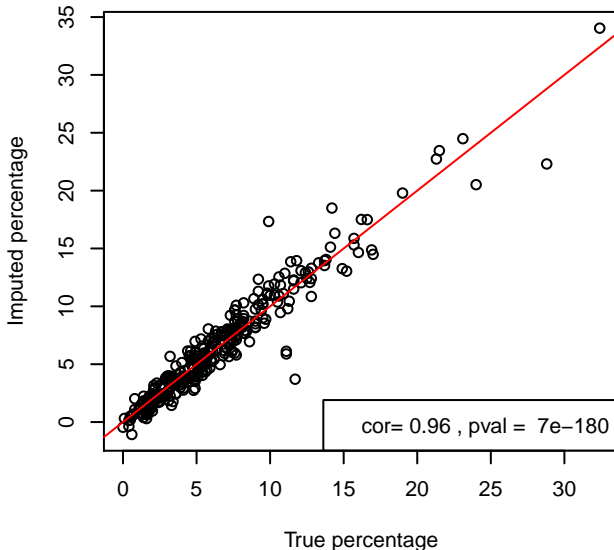

### Basophils Percentage

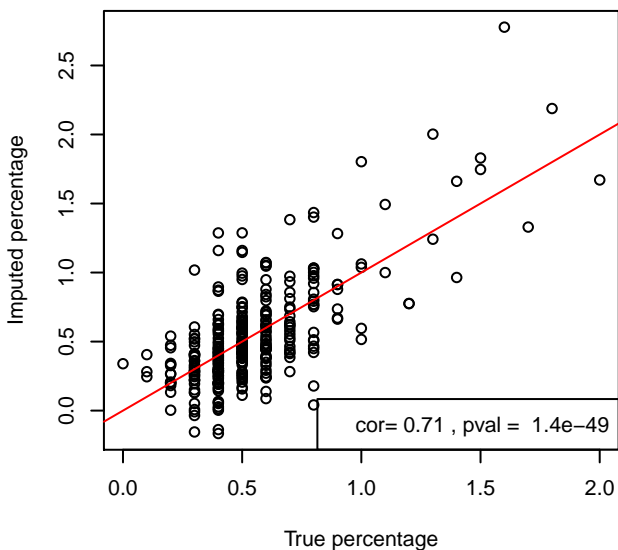

### Boxplot for all samples

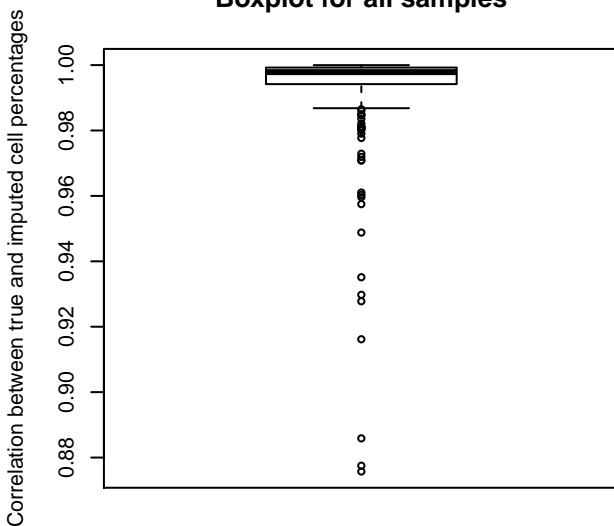

Supplement: NIHMS848613-supplement-1.pdf [file NIHMS848613-supplement-1.pdf]
